# Supplementary material for: Single-Nucleotide Polymorphisms Promote Dysregulation Activation by Essential Gene Mediated Bio-Molecular Interaction in Breast Cancer
Source: Front Oncol. 2021 Dec 2;11:791943. doi: 10.3389/fonc.2021.791943 (PMC8674201; doi:10.3389/fonc.2021.791943)
Supplement: Supplementary file 2 [file Table_1.xlsx]

## Sheet: primer
Supplement table S1. Primer sequence of 16 hub genes by qRT-PCR.
Gene name	F/R	Primer sequence	Primer length	Tm	Product length
ABHD11-AS1	F	GGGGCAGGTACAGAGCA	17	53.9	136
	R	CGCAGGGTGACAGAGGA	17	54.5
ACTN3	F	CTGGTCTCGGACATCGC	17	54.1	215
	R	CGCACCTCCTGTAGCAAA	18	54.9
AQP7	F	TCCTCGTGGTCATCATCG	18	54.5	289
AQP7	R	ATCTTGGGCAATACGGTTA	19	53.1
ASXL3	F	ATGGCACGTTGGATTTAGT	19	52.7	109
ASXL3	R	TCATCAGTTACCTGCTTCG	19	51.3
CDC20B	F	ACTTTGCGAAGAGGCTGTC	19	55.1	131
CDC20B	R	TGGGAGGTAGGTGGTTGA	18	53.3
CYP24A1	F	GGTGGAAACGACAGCAAA	18	54.4	187
CYP24A1	R	CGGCGTAAGCCTCATAGA	18	54.5
DGAT2	F	AAACTGGCCCTGCGTCAT	18	58.4	271
DGAT2	R	CTTGCTGGGTTGGGTGCT	18	58.8
DPY19L2P1	F	TGCCATCATCACTGCTCTTG	20	57.4	197
DPY19L2P1	R	ACCCTGCTTCATCCTACCTG	20	56.5
GNAS-AS1	F	AGCCCAGGATGGATAAGGA	19	56.7	281
GNAS-AS1	R	AACGGCAGCAATCTGGTAA	19	56.5
KLHDC7B-DT	F	GTTCCCATTCTCCCACCA	18	55.4	194
KLHDC7B-DT	R	TGTCACCAGGGCCATCTT	18	56
LHFPL6	F	CGCTATGCCTCCTTCCAG	18	56.3	202
LHFPL6	R	CACAGCCAGCACCAATCA	18	55.9
LINCR-003	F	GAGCATCCTGCCTTCTAACT	20	53.7	206
LINCR-003	R	TCTTCTCACTTCAGCCCAAT	20	54.5
MS4A18	F	GGTTTCTGGCGGTCTTCTCC	20	61	152
MS4A18	R	TGGTGGTATTGGCTGGGTTG	20	61.3
PLA2G4A	F	CACCAGTATTCCCACAAG	18	47.9	285
PLA2G4A	R	AGTAAATGTTGCTGTCCC	18	47.1
WARS2-IT1	F	TAGCAAGGAGCCTAATG	17	45.8	101
WARS2-IT1	R	GCCTCTGGACCTGTGAT	17	49.2
XKR7	F	GCGAAGTCGGATGGAGC	17	56.4	202
XKR7	R	CGGAGAAGAACACGAGCAG	19	56.3
β-actin	F	GGCACCCAGCACAATGAA	18	57.7	168
β-actin	R	TAGAAGCATTTGCGGTGG	18	55.1
F：Forward primer R：Reverse primer Tm：Melting temperatures
